# Supplementary material
Source: ML conference proceedings conference paper supplement (https://openaccess.thecvf.com/content/ICCV_2019/html/Wang_PANet_Few-Shot_Image_ICCV_2019_paper.html)
Supplement: Supplementary file 1 [file Wang_PANet_Few-Shot_Image_ICCV_2019_supplemental.pdf]

# PANet: Few-Shot Image Semantic Segmentation with Prototype Alignment

## Supplementary Material

Kaixin Wang<sup>1</sup> Jun Hao Liew<sup>2</sup> Yingtian Zou<sup>2</sup> Daquan Zhou<sup>1</sup> Jiashi Feng<sup>2</sup>

<sup>1</sup> NGS, National University of Singapore <sup>2</sup> ECE Department, National University of Singapore

{kaixin.wang, liewjunhao}@u.nus.edu {elezouy, elefjia}@nus.edu.sg zhoudaquan21@gmail.com

### 1. More qualitative results on PASCAL-5<sup>i</sup> and MS COCO

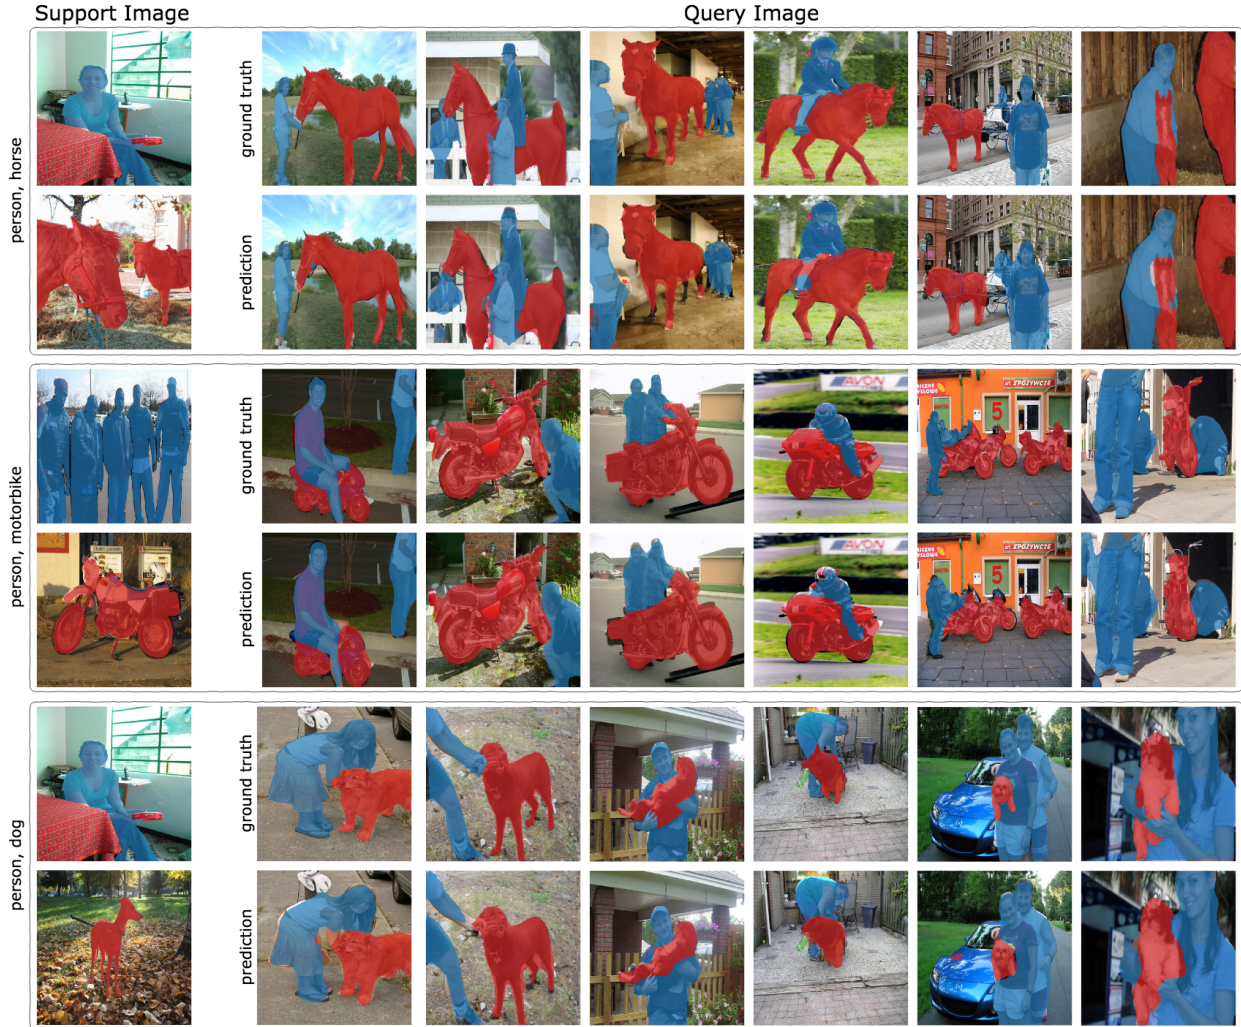

Figure 1: Qualitative results of our model in 2-way 1-shot segmentation on PASCAL-5<sup>i</sup>.



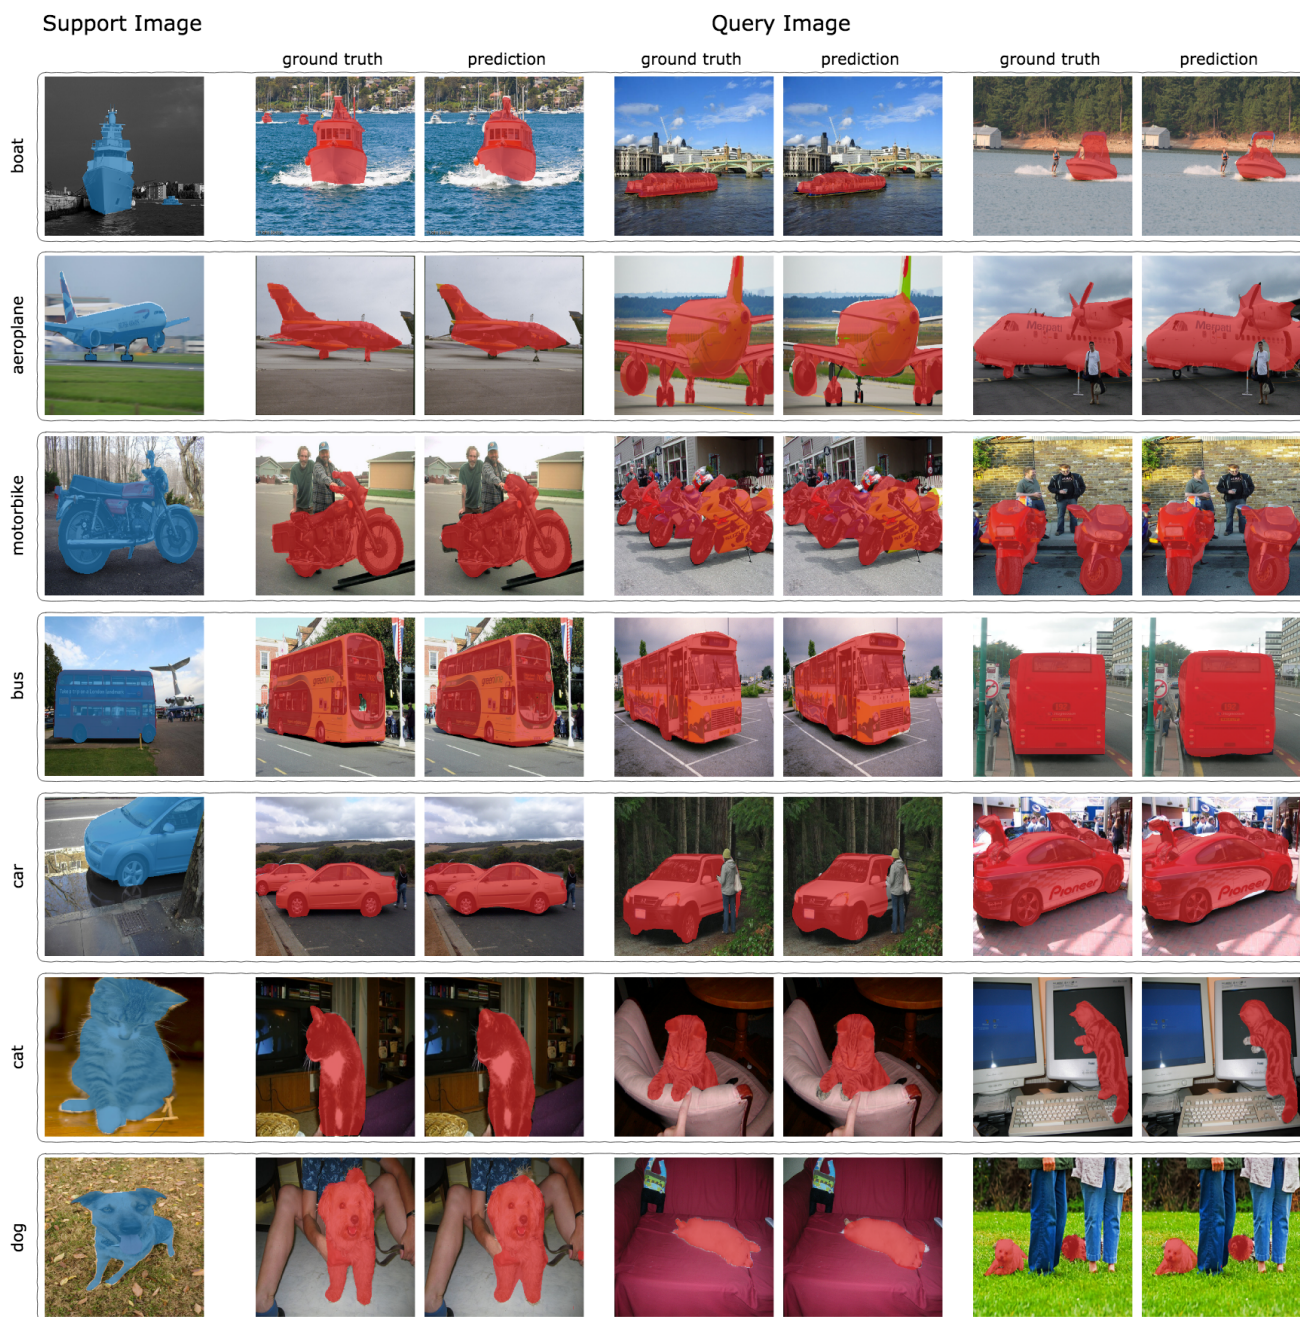

Figure 2: Qualitative results of our model in 1-way 1-shot segmentation on PASCAL-5<sup>i</sup>.



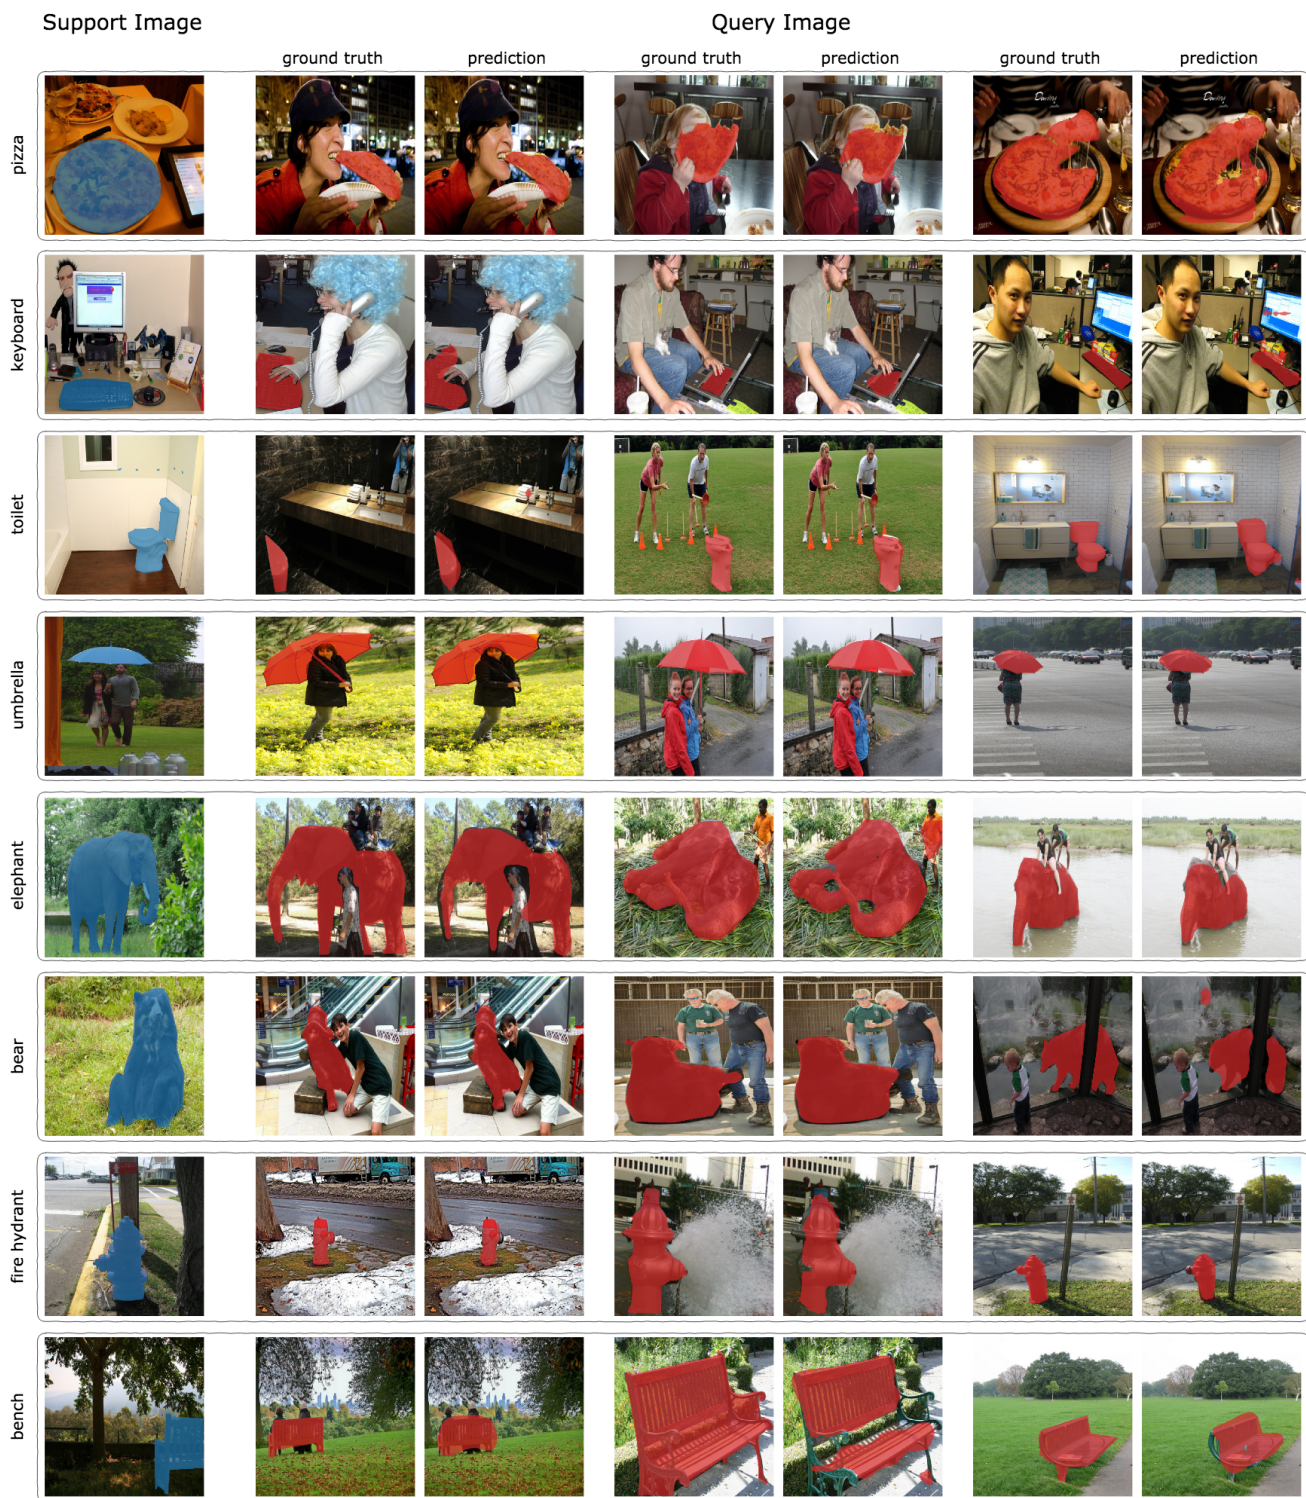

Figure 3: Qualitative results of our model in 1-way 1-shot segmentation on MS COCO.
